# Supplementary material
Source: HighWire-hosted journal article supplement (https://bmjopen.bmj.com/content/8/12/e023951)
Supplement: inline-supplementary-material-2 [file inline-supplementary-material-2.pdf]

**Timeline**  
**Diary: a typical day**

| <b>AGE</b> | <b>Column A<br/>School/work/<br/>training/unemp</b> | <b>Column B<br/>Social context/life events</b> | <b>Column C<br/>Smoking history (views and behaviour)<br/>(For non smokers include 2<sup>nd</sup> hand experience of<br/>smoking)</b> | <b>Column D<br/>E-Cigs history (views and<br/>behaviour)</b> |
|------------|-----------------------------------------------------|------------------------------------------------|---------------------------------------------------------------------------------------------------------------------------------------|--------------------------------------------------------------|
| Pre 16     |                                                     |                                                |                                                                                                                                       |                                                              |
| 16         |                                                     |                                                |                                                                                                                                       |                                                              |
| 17         |                                                     |                                                |                                                                                                                                       |                                                              |
| 18         |                                                     |                                                |                                                                                                                                       |                                                              |
| 19         |                                                     |                                                |                                                                                                                                       |                                                              |
| 20         |                                                     |                                                |                                                                                                                                       |                                                              |
| 21         |                                                     |                                                |                                                                                                                                       |                                                              |
| 22         |                                                     |                                                |                                                                                                                                       |                                                              |
| 23         |                                                     |                                                |                                                                                                                                       |                                                              |
| 24         |                                                     |                                                |                                                                                                                                       |                                                              |

| Time     | Col A<br>Activity | Col B<br>At<br>Home | Col C<br>Other<br>location | Col D<br>Smoking | Col E<br>E-Cigs | Col F<br>Reasons/influences for<br>smoking/e-cigs (or wanting to)? How feeling? |
|----------|-------------------|---------------------|----------------------------|------------------|-----------------|---------------------------------------------------------------------------------|
| 5.00 am  |                   |                     |                            |                  |                 |                                                                                 |
| 5.30 am  |                   |                     |                            |                  |                 |                                                                                 |
| 6.00 am  |                   |                     |                            |                  |                 |                                                                                 |
| 6.30 am  |                   |                     |                            |                  |                 |                                                                                 |
| 7.00 am  |                   |                     |                            |                  |                 |                                                                                 |
| 7.30 am  |                   |                     |                            |                  |                 |                                                                                 |
| 8.00 am  |                   |                     |                            |                  |                 |                                                                                 |
| 8.30 am  |                   |                     |                            |                  |                 |                                                                                 |
| 9.00 am  |                   |                     |                            |                  |                 |                                                                                 |
| 9.30 am  |                   |                     |                            |                  |                 |                                                                                 |
| 10.00 am |                   |                     |                            |                  |                 |                                                                                 |
| 10.30 am |                   |                     |                            |                  |                 |                                                                                 |
| 11.00 am |                   |                     |                            |                  |                 |                                                                                 |
| 11.30 am |                   |                     |                            |                  |                 |                                                                                 |
| 12 noon  |                   |                     |                            |                  |                 |                                                                                 |
| 12.30 pm |                   |                     |                            |                  |                 |                                                                                 |
| 1.00 pm  |                   |                     |                            |                  |                 |                                                                                 |
| 1.30 pm  |                   |                     |                            |                  |                 |                                                                                 |
| 2.00 pm  |                   |                     |                            |                  |                 |                                                                                 |
| 2.30 pm  |                   |                     |                            |                  |                 |                                                                                 |
| 3.00 pm  |                   |                     |                            |                  |                 |                                                                                 |
| 3.30 pm  |                   |                     |                            |                  |                 |                                                                                 |
| 4.00 pm  |                   |                     |                            |                  |                 |                                                                                 |
| 4.30 pm  |                   |                     |                            |                  |                 |                                                                                 |
| 5.00 pm  |                   |                     |                            |                  |                 |                                                                                 |
| 5.30 pm  |                   |                     |                            |                  |                 |                                                                                 |
| 6.00 pm  |                   |                     |                            |                  |                 |                                                                                 |
| 6.30 pm  |                   |                     |                            |                  |                 |                                                                                 |
| 7.00 pm  |                   |                     |                            |                  |                 |                                                                                 |
| 7.30 pm  |                   |                     |                            |                  |                 |                                                                                 |
| 8.00 pm  |                   |                     |                            |                  |                 |                                                                                 |
| 8.30 pm  |                   |                     |                            |                  |                 |                                                                                 |
| 9.00 pm  |                   |                     |                            |                  |                 |                                                                                 |
| 9.30 pm  |                   |                     |                            |                  |                 |                                                                                 |
| 10.00 pm |                   |                     |                            |                  |                 |                                                                                 |
| 10.30 pm |                   |                     |                            |                  |                 |                                                                                 |
| 11.00 pm |                   |                     |                            |                  |                 |                                                                                 |
| 11.30 pm |                   |                     |                            |                  |                 |                                                                                 |
| 12 mid   |                   |                     |                            |                  |                 |                                                                                 |
| 12.30 am |                   |                     |                            |                  |                 |                                                                                 |
| 1.00 am  |                   |                     |                            |                  |                 |                                                                                 |
| 1.30 am  |                   |                     |                            |                  |                 |                                                                                 |
| 2.00 am  |                   |                     |                            |                  |                 |                                                                                 |
| 2.30 am  |                   |                     |                            |                  |                 |                                                                                 |
| 3.00 am  |                   |                     |                            |                  |                 |                                                                                 |
| 3.30 am  |                   |                     |                            |                  |                 |                                                                                 |
| 4.00 am  |                   |                     |                            |                  |                 |                                                                                 |
| 4.30 am  |                   |                     |                            |                  |                 |                                                                                 |

**Diary: Atypical Day**

| Time     | Col A<br>Activity | Col B<br>At<br>Home | Col C<br>Other location | Col D<br>Smoking | Col E<br>E-Cigs | Col F<br>Reasons/influences for<br>smoking/e-cigs (or wanting to)? How feeling? |
|----------|-------------------|---------------------|-------------------------|------------------|-----------------|---------------------------------------------------------------------------------|
| 5.00 am  |                   |                     |                         |                  |                 |                                                                                 |
| 5.30 am  |                   |                     |                         |                  |                 |                                                                                 |
| 6.00 am  |                   |                     |                         |                  |                 |                                                                                 |
| 6.30 am  |                   |                     |                         |                  |                 |                                                                                 |
| 7.00 am  |                   |                     |                         |                  |                 |                                                                                 |
| 7.30 am  |                   |                     |                         |                  |                 |                                                                                 |
| 8.00 am  |                   |                     |                         |                  |                 |                                                                                 |
| 8.30 am  |                   |                     |                         |                  |                 |                                                                                 |
| 9.00 am  |                   |                     |                         |                  |                 |                                                                                 |
| 9.30 am  |                   |                     |                         |                  |                 |                                                                                 |
| 10.00 am |                   |                     |                         |                  |                 |                                                                                 |
| 10.30 am |                   |                     |                         |                  |                 |                                                                                 |
| 11.00 am |                   |                     |                         |                  |                 |                                                                                 |
| 11.30 am |                   |                     |                         |                  |                 |                                                                                 |
| 12 noon  |                   |                     |                         |                  |                 |                                                                                 |
| 12.30 pm |                   |                     |                         |                  |                 |                                                                                 |
| 1.00 pm  |                   |                     |                         |                  |                 |                                                                                 |
| 1.30 pm  |                   |                     |                         |                  |                 |                                                                                 |
| 2.00 pm  |                   |                     |                         |                  |                 |                                                                                 |
| 2.30 pm  |                   |                     |                         |                  |                 |                                                                                 |
| 3.00 pm  |                   |                     |                         |                  |                 |                                                                                 |
| 3.30 pm  |                   |                     |                         |                  |                 |                                                                                 |
| 4.00 pm  |                   |                     |                         |                  |                 |                                                                                 |
| 4.30 pm  |                   |                     |                         |                  |                 |                                                                                 |
| 5.00 pm  |                   |                     |                         |                  |                 |                                                                                 |
| 5.30 pm  |                   |                     |                         |                  |                 |                                                                                 |
| 6.00 pm  |                   |                     |                         |                  |                 |                                                                                 |
| 6.30 pm  |                   |                     |                         |                  |                 |                                                                                 |
| 7.00 pm  |                   |                     |                         |                  |                 |                                                                                 |
| 7.30 pm  |                   |                     |                         |                  |                 |                                                                                 |
| 8.00 pm  |                   |                     |                         |                  |                 |                                                                                 |
| 8.30 pm  |                   |                     |                         |                  |                 |                                                                                 |
| 9.00 pm  |                   |                     |                         |                  |                 |                                                                                 |
| 9.30 pm  |                   |                     |                         |                  |                 |                                                                                 |
| 10.00 pm |                   |                     |                         |                  |                 |                                                                                 |
| 10.30 pm |                   |                     |                         |                  |                 |                                                                                 |
| 11.00 pm |                   |                     |                         |                  |                 |                                                                                 |
| 11.30 pm |                   |                     |                         |                  |                 |                                                                                 |
| 12 mid   |                   |                     |                         |                  |                 |                                                                                 |
| 12.30 am |                   |                     |                         |                  |                 |                                                                                 |
| 1.00 am  |                   |                     |                         |                  |                 |                                                                                 |
| 1.30 am  |                   |                     |                         |                  |                 |                                                                                 |
| 2.00 am  |                   |                     |                         |                  |                 |                                                                                 |
| 2.30 am  |                   |                     |                         |                  |                 |                                                                                 |
| 3.00 am  |                   |                     |                         |                  |                 |                                                                                 |
| 3.30 am  |                   |                     |                         |                  |                 |                                                                                 |
| 4.00 am  |                   |                     |                         |                  |                 |                                                                                 |
| 4.30 am  |                   |                     |                         |                  |                 |                                                                                 |
